# Supplementary material for: Changes in antimicrobial resistance phenotypes and genotypes in Streptococcus suis strains isolated from pigs in the Tokai area of Japan
Source: PubMed Central journal article supplement — J Vet Med Sci. 2019 Nov 21;82(1):9–13. doi: 10.1292/jvms.19-0449 (PMC6983656; doi:10.1292/jvms.19-0449), 2019-11-21
Supplement: jvms-82-009-s001.pdf [file jvms-82-009-s001.pdf]

## SUPPLEMENTAL FILE

*Streptococcus suis* was isolated from samples of the bacterial endocarditis lesions of pigs by culture on trypticase soy agar plates containing 5% horse blood at 37°C for 24 h under aerobic/anaerobic conditions (Anaeropack Kenki, Mitsubishi Gas Kagaku, Tokyo, Japan). Isolation of *S. suis* from the tonsils of pigs without bacterial endocarditis was done by culture of samples on trypticase soy agar plates containing 5% horse blood supplemented with *Streptococcus* selective supplement (Kanto Kagaku, Tokyo, Japan) at 37°C for 24 h under 5% CO<sub>2</sub> conditions (Anaeropack CO<sub>2</sub>, Mitsubishi Gas Kagaku, Tokyo, Japan). Colonies suspected of being *S. suis*, based on  $\alpha$  or  $\beta$  hemolysis, observation of gram-positive staining cocci, and absence of catalase activity, were identified by PCR assay targeting the *recN* gene [S1].

The types of *cps* were identified using multiplex PCR assays [S2]. Putative ST complexes were identified based on PCR assays targeting pilus-associated genes (*sbp2*, *sep1*, and *sgp1*) [S3]. Virulence-associated gene profiling was performed using PCR assays for *epf*, *sly*, *mrp*, *arcA* [S4], and *ofs* [S5] genes.

## REFERENCES

- [S1] Ishida, S., Tien, L. H. T., Osawa, R., Tohya, M., Nomoto, R., Kawamura, Y., Takahashi, T., Kikuchi, N., Kikuchi, K. and Sekizaki, T. 2014. Development of an appropriate PCR system for the reclassification of *Streptococcus suis*. *J. Microbiol. Meth.* **107**: 66-70.
- [S2] Kerdsin, A., Akeda, Y., Hatrongjit, R., Detchawna, U., Sekizaki, T., Hamada, S., Gottschalk, M. and Oichi, K. 2014. *Streptococcus suis* serotyping by a new multiplex PCR. *J. Med. Microbiol.* **63**: 824-830.
- [S3] Takamatsu, D., Nishio, H., Ishiji, T., Ishiji, J., Osaki, M., Fittipaldi, N.,

Gottschalk, M., Thravichitkul, P., Takai, S. and Sekizaki, T. 2009. Genetic organization and preferential distribution of putative pilus gene clusters in *Streptococcus suis*. *Vet. Microbiol.* **138**: 132-139.

[S4] Silva, M. L. G., Baums, C. G., Rehm, T., Wisselink, H. J., Goethe, R. and Valentin-Weigand, P. 2006. Virulence-associated gene profiling of *Streptococcus suis* isolates by PCR. *Vet. Microbiol.* **115**: 117-127.

[S5] Takamatsu, D., Osaki, M., Tharavichitkul, P., Takai, S. and Sekizaki, T. 2008. Allelic variation and prevalence of serum opacity factor among the *Streptococcus suis* population. *J. Med. Microbiol.* **57**: 488-494.
